# Supplementary material
Source: PubMed Central journal article supplement (PMC11524409)
Supplement: ehp14418.s001.acco.pdf [file ehp14418.s001.acco.pdf]

**Note to readers with disabilities:** *EHP* strives to ensure that all journal content is accessible to all readers. However, some figures and Supplemental Material published in *EHP* articles may not conform to [508 standards](#) due to the complexity of the information being presented. If you need assistance accessing journal content, please contact [ehpsubmissions@niehs.nih.gov](mailto:ehpsubmissions@niehs.nih.gov). Our staff will work with you to assess and meet your accessibility needs within 3 working days.

### **Supplemental Material**

#### **Associations between Fine Particulate Matter Components, Their Sources, and Cognitive Outcomes in Children Ages 9–10 Years Old from the United States**

Kirthana Sukumaran, Katherine L. Botterhorn, Joel Schwartz, Jim Gauderman, Carlos Cardenas-Iniguez, Rob McConnell, Daniel A. Hackman, Kiros Berhane, Hedyeh Ahmadi, Shermaine Abad, Rima Habre, and Megan M. Herting

#### **Table of Contents**

##### **Supplemental Methods**

**Table S1.** Comparison of ABCD Study Cohort and analytic sample demographics.

**Table S2.** Prediction performance metrics (root mean square error) from ensemble models of PM<sub>2.5</sub> components, as previously reported.

**Table S3.** Grouped Weighted quantile sum results showing cumulative associations between groups of PM components, based on six identified source factors, and neurocognitive performance in 9–10-year-old participants from the ABCD Study cohort (n=8,589), 2016-2018 also adjusting for exposure to ozone.

**Table S4.** Associations between each PM<sub>2.5</sub> source factor and cognitive outcome in 9–10-year-old participants from the ABCD Study cohort (n=8,588), 2016-2018 also adjusting for exposure to ozone.

**Table S5.** Weighted Quantile Sum (WQS) regression results examining the mixture of 15 PM components on neurocognitive performance in 9–10-year-old participants from the ABCD Study cohort (n=8,580), 2016-2018, also adjusting for parental education.

**Table S6.** Grouped Weighted quantile sum results showing cumulative associations between groups of PM components, based on six identified source factors, and neurocognitive performance in 9–10-year-old participants from the ABCD Study cohort (n=8,580), 2016-2018, including parental education as an additional covariate.

**Table S7.** Associations between each PM<sub>2.5</sub> source factor and cognitive outcome in 9–10-year-old participants from the ABCD Study cohort (n=8,580), 2016-2018, including parental education as an additional covariate.

**Figure S1.** Directed Acyclic Graph (DAG) of potential confounders that may predict link between exposure to air pollution (based on residential location) and cognitive performance of children. A) Dagitty model of potential confounders to identify minimally sufficient set (i.e. adjusted variables = white circles). B) Simplified DAG of confounders adjusted for in final models based on A.

**Figure S2.** Correlation [Spearman] matrix of 15 PM<sub>2.5</sub> components estimated at the child's residence of all 9–10-year-old participants from the ABCD Study cohort (n=8,589), 2016-2018.

**Figure S3.** Distributions of residential PM<sub>2.5</sub> component exposure concentrations of all 9–10-year-old participants from the ABCD Study cohort (n=8,589), 2016-2018, plot by site. Study sites are color coded by U.S. geographical region. Abbreviations: SO<sub>4</sub><sup>2-</sup> for sulfate; NO<sub>3</sub><sup>-</sup> for nitrate; NH<sub>4</sub><sup>+</sup> for ammonium; OC for organic carbon; EC for elemental carbon; Zn for zinc; V or vanadium; K for potassium; Si for silicon; Pb for lead; Ni for nickel; Fe for iron; Cu for copper; Ca for calcium; Br for bromine. Numeric data for Supplemental Figure 3 can be found in Excel Table S9.

**Figure S4.** Weights of PM components, clustered by source factor groups, contributing to significant grouped mixture effects on neurocognitive outcomes in 9–10-year-old participants from the ABCD Study cohort (n=8,589), 2016-2018. A) Weights for associations seen for general cognitive ability and crustal (negative association), industrial (negative association), and traffic (positive association) related components. B) Weights for association seen for learning & memory and ammonium nitrate-related components (negative association). C) Weights for associations seen for executive function and traffic (negative association) and biomass burning (positive association) related components. Abbreviations: NO<sub>3</sub><sup>-</sup> for nitrate; NH<sub>4</sub><sup>+</sup> for ammonium; OC for organic carbon; EC for elemental carbon; Zn for zinc; K for potassium; Si for silicon; Pb for lead; Ni for nickel; Fe for iron; Cu for copper; Ca for calcium; Br for bromine. Numeric data for Supplemental Figure 4 can be found in Excel Table S10.

## References

**Additional File-** Excel Document

## Supplemental Methods

### Distributed acyclic graph (DAG), selection of confounders, and identified minimally sufficient dataset:

Using variables identified based on the literature and a directed acyclic graph (DAG) approach,<sup>1,2</sup> we have identified a single minimal sufficient adjustment sets of variables that, when controlled for, are expected to block biasing pathways in our final analyses. To identify this final minimal sufficient list, we first started by included several a priori observed and unobserved confounders that were known to predict neurobehavioral development and may also influence where people live (and thus residential air pollution exposure (**Supplemental Figure 1**)). This included the following variables: **1) Demographics:** Child's age, sex and race/ethnicity; **2) Socioeconomic Position (SES):** Parent report of parental education, family income, parental employment status, marital status; **3) Perceived Neighborhood Safety:** Neighborhood safety<sup>3,4</sup> calculated as an average score derived from three questions of the ABCD Parent Neighborhood quality/Crime Survey Modified from PhenX (NSC); **4) Urban vs. Rural classification:** Determined and assigned by the 2010 Census Urban and Rural Classification; **5) Noise Exposure:** estimated ambient anthropomorphic sound levels using a U.S. wide geospatial model<sup>5</sup> that sources from 479 site locations and estimated at a 1-km grid across the U.S.; **6) Parental Factors:** Biological maternal age; **7) Child's Pubertal development**<sup>6</sup>; **8) Secondhand Smoke Exposure:** Through parent-report, information is obtained during the 6-months prior to each visit and during the pregnancy; and **9) Lifestyle Factors:** Physical activity of the child and average screen time use. We also considered unobserved variables: Parent Race/Ethnicity (Racialization) is an unmeasured variable which is included in the DAG to represent the many economic, cultural, and societal factors present in the United States that may impact where people live and the situation in which children grow and develop, which is likely to have effects on cognitive development. Greenspace Access is another unmeasured variable that is often a direct result of a person's residential location, may influence the severity of air pollution exposure in a geographic area<sup>7</sup>, and may have downstream effects on cognitive development. Finally, residential address is included as an unmeasured variable, as the air pollution assigned to each study participant is assigned to that participant's residential address, but this study does not utilize the actual geolocation of each subject or any spatial analyses with this geolocation.

Next, we created a DAG using DAGgitty<sup>8</sup>, a software designed to assist in the creation and interpretation of causal diagrams. DAGgitty uses color-coding of variables and arrows to clarify how variables interrelate to each other and to the exposure and outcome to identify biasing pathways. Our team worked together to use field-specific background knowledge, familiarity with published literature, and intuition to draw the DAG presented in **Supplemental Figure 1A**, which aims to create a complete picture of the variables available within ABCD that may be relevant. Beyond three variables identified (Child's age, sex, and race/ethnicity) as important *a priori* demographic factors in all models, our analysis in DAGgitty produced a single minimal sufficient adjustment set (i.e. white circles in **Supplemental Figure 1A** and simplified in **Supplemental Figure 1B**). Details on the color-coding system used by DAGgitty is provided in the **Supplemental Figure 1A** legend key.

## Supplemental Results

**Supplemental Table 1.** Comparison of ABCD Study Cohort and analytic sample demographics

| <b>Variables</b>                      | <b>Study Sample<br/>(N=8,589)</b> | <b>ABCD Sample<br/>(N=11,876)</b> |
|---------------------------------------|-----------------------------------|-----------------------------------|
| <b>Age (months)</b>                   |                                   |                                   |
| Mean (SD)                             | 119 (7.4)                         | 119 (7.5)                         |
| <b>Sex at birth</b>                   |                                   |                                   |
| Female                                | 4086 (47.6 %)                     | 5680 (47.8%)                      |
| Male                                  | 4503 (52.4 %)                     | 6196 (52.2%)                      |
| <b>Race/Ethnicity</b>                 |                                   |                                   |
| Asian                                 | 208 (2.4 %)                       | 252 (2.1%)                        |
| Black                                 | 1252 (14.6 %)                     | 1784 (15.0%)                      |
| Hispanic                              | 1822 (21.2 %)                     | 2411 (20.3%)                      |
| Other <sup>a</sup>                    | 891 (10.4 %)                      | 1247 (10.5%)                      |
| White                                 | 4416 (51.4 %)                     | 6180 (52.0%)                      |
| <b>Total household income</b>         |                                   |                                   |
| <\$50k                                | 2338 (27.2 %)                     | 3223 (27.1%)                      |
| >=\$50k & <\$100k                     | 2233 (26 %)                       | 3071 (25.9%)                      |
| >=\$100k                              | 3289 (38.3 %)                     | 4564 (38.4%)                      |
| Don't Know or Refuse                  | 729 (8.5 %)                       | 1016 (8.6%)                       |
| <b>Urbanicity</b>                     |                                   |                                   |
| Urbanized Area                        | 7633 (88.9 %)                     | 9856 (83.0%)                      |
| Urban Cluster                         | 259 (3 %)                         | 372 (3.1%)                        |
| Rural                                 | 697 (8.1 %)                       | 966 (8.1%)                        |
| <b>Neighborhood Safety</b>            |                                   |                                   |
| Mean (SD)                             | 3.87 (0.97)                       | 3.89 (0.98)                       |
| <b>Physical Activity (hours/week)</b> |                                   |                                   |
| Mean (SD)                             | 3.5 (2.3)                         | 3.49 (2.3)                        |
| <b>Screen times (hours/day)</b>       |                                   |                                   |
| Mean (SD)                             | 2.94 (2.21)                       | 2.96 (2.4)                        |

Values shown are either mean (standard deviation) or N (% frequency). <sup>a</sup> “Other” race/ethnicity category includes subjects who were parent-identified as American Indian/Native American, Alaska Native, Native Hawaiian, Guamanian, Samoan, Other Pacific Islander, Asian Indian, Chinese, Filipino, Japanese, Korean, Vietnamese, Other Asian, or Other Race ((participants that were identified in more than one category or multi-racial).

**Supplemental Table 2.** Prediction performance metrics (root mean square error) from ensemble models of PM<sub>2.5</sub> components, as previously reported<sup>9</sup> .

| <b>Component</b>              | <b>Model RMSE</b>          |
|-------------------------------|----------------------------|
| EC                            | 0.09 (µg/m <sup>3</sup> )  |
| NH <sub>4</sub> <sup>+</sup>  | 0.09 (µg/m <sup>3</sup> )  |
| NO <sub>3</sub> <sup>-</sup>  | 0.07 (µg/m <sup>3</sup> )  |
| OC                            | 0.18 (µg/m <sup>3</sup> )  |
| SO <sub>4</sub> <sup>2-</sup> | 0.28 (µg/m <sup>3</sup> )  |
| Br                            | 0.18 (ng/m <sup>3</sup> )  |
| Ca                            | 2.86 (ng/m <sup>3</sup> )  |
| Cu                            | 1.35 (ng/m <sup>3</sup> )  |
| Fe                            | 4.99 (ng/m <sup>3</sup> )  |
| K                             | 4.77 (ng/m <sup>3</sup> )  |
| Ni                            | 0.45 (ng/m <sup>3</sup> )  |
| Pb                            | 0.34 (ng/m <sup>3</sup> )  |
| Si                            | 10.15 (ng/m <sup>3</sup> ) |
| V                             | 0.73 (ng/m <sup>3</sup> )  |
| Zn                            | 1.82 (ng/m <sup>3</sup> )  |

**Supplemental Table 3.** Grouped Weighted quantile sum results showing cumulative associations between groups of PM components, based on six identified source factors, and neurocognitive performance in 9–10-year-old participants from the ABCD Study cohort (n=8,589), 2016-2018 also adjusting for exposure to ozone.

| Outcome                          | WQS mixture group membership                                                      | Estimate                                 | Std Error                               | p-value          |
|----------------------------------|-----------------------------------------------------------------------------------|------------------------------------------|-----------------------------------------|------------------|
| <b>General Cognitive Ability</b> | <b>Ca, Si (Crustal)</b>                                                           | $-2.51 \times 10^{-2}$                   | <b><math>1.18 \times 10^{-2}</math></b> | <b>0.0329**</b>  |
|                                  | SO <sub>4</sub> <sup>2-</sup> , V (coal-burning power plants)                     | $-1.73 \times 10^{-3}$                   | $9.41 \times 10^{-3}$                   | 0.8539           |
|                                  | OC, K, Br (Biomass Burning)                                                       | $-4.04 \times 10^{-3}$                   | $1.01 \times 10^{-2}$                   | 0.6887           |
|                                  | <b>EC, Cu, Fe (Traffic)</b>                                                       | <b><math>2.38 \times 10^{-2}</math></b>  | <b><math>7.43 \times 10^{-3}</math></b> | <b>0.0013***</b> |
|                                  | NH <sub>4</sub> <sup>+</sup> , NO <sub>3</sub> <sup>-</sup> (Ammonium Nitrates)   | $-1.21 \times 10^{-2}$                   | $1.11 \times 10^{-2}$                   | 0.2724           |
|                                  | <b>Pb, Ni, Zn (Industrial)</b>                                                    | <b><math>-1.89 \times 10^{-2}</math></b> | <b><math>8.84 \times 10^{-3}</math></b> | <b>0.0325**</b>  |
| <b>Learning &amp; Memory</b>     | Ca, Si (Crustal)                                                                  | $-1.45 \times 10^{-2}$                   | $1.18 \times 10^{-2}$                   | 0.2173           |
|                                  | SO <sub>4</sub> <sup>2-</sup> , V (coal-burning power plants)                     | $9.33 \times 10^{-3}$                    | $8.82 \times 10^{-3}$                   | 0.2901           |
|                                  | OC, K, Br (Biomass Burning)                                                       | $8.70 \times 10^{-3}$                    | $9.82 \times 10^{-3}$                   | 0.3753           |
|                                  | EC, Cu, Fe (Traffic)                                                              | $-3.78 \times 10^{-2}$                   | $9.46 \times 10^{-3}$                   | 0.6893           |
|                                  | <b>NH<sub>4</sub><sup>+</sup>, NO<sub>3</sub><sup>-</sup> (Ammonium Nitrates)</b> | <b><math>-3.34 \times 10^{-2}</math></b> | <b><math>1.10 \times 10^{-2}</math></b> | <b>0.0021***</b> |
|                                  | Pb, Ni, Zn (Industrial)                                                           | $-6.74 \times 10^{-4}$                   | $9.41 \times 10^{-3}$                   | 0.5024           |
| <b>Executive Function</b>        | Ca, Si (Crustal)                                                                  | $-1.88 \times 10^{-2}$                   | $1.31 \times 10^{-2}$                   | 0.1511           |
|                                  | SO <sub>4</sub> <sup>2-</sup> , V (coal-burning power plants)                     | $-7.85 \times 10^{-4}$                   | $8.49 \times 10^{-3}$                   | 0.9367           |
|                                  | <b>OC, K, Br (Biomass Burning)</b>                                                | <b><math>2.88 \times 10^{-2}</math></b>  | <b><math>1.16 \times 10^{-2}</math></b> | <b>0.0128**</b>  |
|                                  | <b>EC, Cu, Fe (Traffic)</b>                                                       | <b><math>-2.19 \times 10^{-2}</math></b> | <b><math>1.08 \times 10^{-2}</math></b> | <b>0.0433**</b>  |
|                                  | NH <sub>4</sub> <sup>+</sup> , NO <sub>3</sub> <sup>-</sup> (Ammonium Nitrates)   | $-1.74 \times 10^{-2}$                   | $1.24 \times 10^{-2}$                   | 0.1574           |
|                                  | Pb, Ni, Zn (Industrial)                                                           | $-4.44 \times 10^{-4}$                   | $1.04 \times 10^{-2}$                   | 0.9594           |

<sup>a</sup>Estimates are per 1-unit increase in the grouped WQS index, interpreted as approximately 1 decile increase in source factor groups. Results from Grouped WQS regression models wherein the 15 PM components grouped into six source factors, adjusting for age, sex, race and ethnicity, overall household income, perceived neighborhood safety, urbanicity, physical activity, and daily screen average hours and site and exposure to annual levels of ozone. Abbreviations: SO<sub>4</sub><sup>2-</sup> for sulfate; NO<sub>3</sub><sup>-</sup> for nitrate; NH<sub>4</sub><sup>+</sup> for ammonium; OC for organic carbon; EC for elemental carbon; Zn for zinc; V or vanadium; K for potassium; Si for silicon; Pb for lead; Ni for nickel; Fe for iron; Cu for copper; Ca for calcium; Br for bromine. †PMF identified ammonium sulfates components (SO<sub>4</sub><sup>2-</sup>, V, and NH<sub>4</sub><sup>+</sup>) were reduced to SO<sub>4</sub><sup>2-</sup>, V (likely reflecting coal-burning power plants) to reduce overlap of NH<sub>4</sub><sup>+</sup> in GQWS analysis. Bolded values reflect p<0.05.

**Supplemental Table 4.** Associations between each PM<sub>2.5</sub> source factor and cognitive outcome in 9–10-year-old participants from the ABCD Study cohort (n=8,588), 2016-2018 also adjusting for exposure to ozone.

| Source            | General Cognitive Ability |                        |         | Learning & Memory             |                              |                  | Executive Function      |                        |         |
|-------------------|---------------------------|------------------------|---------|-------------------------------|------------------------------|------------------|-------------------------|------------------------|---------|
|                   | <i>b</i>                  | Std Error              | p value | <i>b</i>                      | Std Error                    | p value          | <i>b</i>                | Std Error              | p value |
| Crustal           | -2.70× 10 <sup>-2</sup>   | 2.67× 10 <sup>-2</sup> | 0.3119  | -2.48× 10 <sup>-2</sup>       | 2.70× 10 <sup>-2</sup>       | 0.9269           | -5.58× 10 <sup>-2</sup> | 2.98× 10 <sup>-2</sup> | 0.0613  |
| Ammonium Sulfates | 6.53× 10 <sup>-3</sup>    | 4.61× 10 <sup>-2</sup> | 0.8872  | 6.68× 10 <sup>-3</sup>        | 4.65× 10 <sup>-2</sup>       | 0.1511           | 1.15× 10 <sup>-1</sup>  | 5.14× 10 <sup>-2</sup> | 0.0246  |
| Biomass Burning   | -8.07× 10 <sup>-3</sup>   | 4.90× 10 <sup>-2</sup> | 0.8693  | -2.34× 10 <sup>-2</sup>       | 4.95× 10 <sup>-2</sup>       | 0.6360           | 2.78× 10 <sup>-2</sup>  | 5.47× 10 <sup>-2</sup> | 0.6114  |
| Traffic           | 1.29× 10 <sup>-2</sup>    | 2.69× 10 <sup>-2</sup> | 0.6322  | -3.29× 10 <sup>-2</sup>       | 2.72× 10 <sup>-2</sup>       | 0.2261           | -5.95× 10 <sup>-2</sup> | 3.00× 10 <sup>-2</sup> | 0.0473  |
| Ammonium Nitrates | -5.09× 10 <sup>-2</sup>   | 3.39× 10 <sup>-2</sup> | 0.1336  | <b>-1.29× 10<sup>-1</sup></b> | <b>3.42× 10<sup>-2</sup></b> | <b>0.0001***</b> | 1.65× 10 <sup>-3</sup>  | 3.78× 10 <sup>-2</sup> | 0.9652  |
| Industrial        | 8.09× 10 <sup>-3</sup>    | 3.75× 10 <sup>-2</sup> | 0.8290  | 2.16× 10 <sup>-2</sup>        | 3.78× 10 <sup>-2</sup>       | 0.5680           | -3.95× 10 <sup>-2</sup> | 4.18× 10 <sup>-2</sup> | 0.3446  |

Linear regression models, adjusted for age, sex, race and ethnicity, overall household income, neighborhood safety, urbanicity, physical activity, daily screentime average hours and site. Estimates include unstandardized beta coefficients (*b*), standard errors, and p-values. Bolded values reflected models passing Bonferroni correction (p=0.008).

**Supplemental Table 5.** Weighted Quantile Sum (WQS) regression results examining the mixture of 15 PM components on neurocognitive performance in 9–10-year-old participants from the ABCD Study cohort (n=8,580), 2016-2018, also adjusting for parental education.

| <b>Outcome</b>                   | <b>Estimate<sup>a</sup></b> | <b>Std Error</b>         | <b>p-value</b> |
|----------------------------------|-----------------------------|--------------------------|----------------|
| <b>General Cognitive Ability</b> | -1.843 × 10 <sup>-2</sup>   | 9.66 × 10 <sup>-3</sup>  | 0.0642         |
| <b>Learning &amp; Memory</b>     | -4.313 × 10 <sup>-2</sup>   | 1.402 × 10 <sup>-2</sup> | <b>0.0024</b>  |
| <b>Executive Function</b>        | -2.661 × 10 <sup>-2</sup>   | 1.445 × 10 <sup>-2</sup> | 0.0577         |

<sup>a</sup>Estimates are per 1-unit increase in the WQS index, reflecting as approximately 1 decile increase in all PM components. WQS regression models of the 15 PM components, adjusting for age, sex, race and ethnicity, overall household income, perceived neighborhood safety, urbanicity, physical activity, and daily screen average hours, site and parental education. Bolded values reflect p<0.05.



**Supplemental Table 6.** Grouped Weighted quantile sum results showing cumulative associations between groups of PM components, based on six identified source factors, and neurocognitive performance in 9–10-year-old participants from the ABCD Study cohort (n=8,580), 2016-2018, including parental education as an additional covariate.

| Outcome                          | WQS mixture group membership                                                      | Estimate <sup>a</sup>          | Std Error                     | p-value          |
|----------------------------------|-----------------------------------------------------------------------------------|--------------------------------|-------------------------------|------------------|
| <b>General Cognitive Ability</b> | Ca, Si (Crustal)                                                                  | -2.06 × 10 <sup>-2</sup>       | 1.14 × 10 <sup>-2</sup>       | 0.0709           |
|                                  | SO <sub>4</sub> <sup>2-</sup> , V (portion of Ammonium Sulfates†)                 | -2.95 × 10 <sup>-3</sup>       | 9.15 × 10 <sup>-3</sup>       | 0.7471           |
|                                  | OC, K, Br (Biomass Burning)                                                       | -1.28 × 10 <sup>-2</sup>       | 9.82 × 10 <sup>-3</sup>       | 0.1920           |
|                                  | <b>EC, Cu, Fe (Traffic)</b>                                                       | <b>2.51 × 10<sup>-2</sup></b>  | <b>7.48 × 10<sup>-3</sup></b> | <b>0.0007***</b> |
|                                  | NH <sub>4</sub> <sup>+</sup> , NO <sub>3</sub> <sup>-</sup> (Ammonium Nitrates)   | -7.44 × 10 <sup>-3</sup>       | 1.08 × 10 <sup>-2</sup>       | 0.4917           |
|                                  | Pb, Ni, Zn (Industrial)                                                           | -1.34 × 10 <sup>-2</sup>       | 8.86 × 10 <sup>-3</sup>       | 0.1304           |
| <b>Learning &amp; Memory</b>     | Ca, Si (Crustal)                                                                  | -1.21 × 10 <sup>-2</sup>       | 1.16 × 10 <sup>-2</sup>       | 0.2969           |
|                                  | SO <sub>4</sub> <sup>2-</sup> , V (portion of Ammonium Sulfates†)                 | 1.04 × 10 <sup>-2</sup>        | 8.36 × 10 <sup>-3</sup>       | 0.2129           |
|                                  | OC, K, Br (Biomass Burning)                                                       | 8.03 × 10 <sup>-3</sup>        | 9.81 × 10 <sup>-3</sup>       | 0.4184           |
|                                  | EC, Cu, Fe (Traffic)                                                              | -3.76 × 10 <sup>-3</sup>       | 9.56 × 10 <sup>-3</sup>       | 0.6942           |
|                                  | <b>NH<sub>4</sub><sup>+</sup>, NO<sub>3</sub><sup>-</sup> (Ammonium Nitrates)</b> | <b>-3.00 × 10<sup>-2</sup></b> | <b>1.09 × 10<sup>-2</sup></b> | <b>0.0061***</b> |
|                                  | Pb, Ni, Zn (Industrial)                                                           | -7.62 × 10 <sup>-3</sup>       | 9.46 × 10 <sup>-3</sup>       | 0.4209           |
| <b>Executive Function</b>        | Ca, Si (Crustal)                                                                  | -1.93 × 10 <sup>-2</sup>       | 1.33 × 10 <sup>-2</sup>       | 0.1461           |
|                                  | SO <sub>4</sub> <sup>2-</sup> , V (portion of Ammonium Sulfates†)                 | 8.23 × 10 <sup>-4</sup>        | 8.78 × 10 <sup>-3</sup>       | 0.9253           |
|                                  | <b>OC, K, Br (Biomass Burning)</b>                                                | <b>2.91 × 10<sup>-2</sup></b>  | <b>1.15 × 10<sup>-2</sup></b> | <b>0.0495*</b>   |
|                                  | <b>EC, Cu, Fe (Traffic)</b>                                                       | <b>-2.13 × 10<sup>-2</sup></b> | <b>1.08 × 10<sup>-2</sup></b> | <b>0.0397*</b>   |
|                                  | NH <sub>4</sub> <sup>+</sup> , NO <sub>3</sub> <sup>-</sup> (Ammonium Nitrates)   | -1.59 × 10 <sup>-2</sup>       | 1.24 × 10 <sup>-2</sup>       | 0.1981           |
|                                  | Pb, Ni, Zn (Industrial)                                                           | -2.08 × 10 <sup>-3</sup>       | 1.04 × 10 <sup>-2</sup>       | 0.8407           |

<sup>a</sup>Estimates are per 1-unit increase in the grouped WQS index, interpreted as approximately 1 decile increase in source factor groups. Results from Grouped WQS regression models wherein the 15 PM components grouped into six source factors, adjusting for age, sex, race and ethnicity, overall household income, perceived neighborhood safety, urbanicity, physical activity, and daily screen average hours, site and parental education. Abbreviations: SO<sub>4</sub><sup>2-</sup> for sulfate; NO<sub>3</sub><sup>-</sup> for nitrate; NH<sub>4</sub><sup>+</sup> for ammonium; OC for organic carbon; EC for elemental carbon; Zn for zinc; V or vanadium; K for potassium; Si for silicon; Pb for lead; Ni for nickel; Fe for iron; Cu for copper; Ca for calcium; Br for bromine. †PMF identified ammonium sulfates components (SO<sub>4</sub><sup>2-</sup>, V, and NH<sub>4</sub><sup>+</sup>) were reduced to SO<sub>4</sub><sup>2-</sup>, V (likely reflecting coal-burning power plants) to reduce overlap of NH<sub>4</sub><sup>+</sup> in GQWS analysis. Bolded values reflect p<0.05.

**Supplemental Table 7.** Associations between each PM<sub>2.5</sub> source factor and cognitive outcome in 9–10-year-old participants from the ABCD Study cohort (n=8,580), 2016-2018, including parental education as an additional covariate.

| Source            | General Cognitive Ability |                        |         | Learning & Memory              |                              |                 | Executive Function      |                        |         |
|-------------------|---------------------------|------------------------|---------|--------------------------------|------------------------------|-----------------|-------------------------|------------------------|---------|
|                   | <i>b</i>                  | Std Error              | p value | <i>b</i>                       | Std Error                    | p value         | <i>b</i>                | Std Error              | p value |
| Crustal           | -2.01× 10 <sup>-2</sup>   | 2.60× 10 <sup>-2</sup> | 0.4391  | -1.09× 10 <sup>-3</sup>        | 2.68× 10 <sup>-2</sup>       | 0.9674          | -5.49× 10 <sup>-2</sup> | 2.98× 10 <sup>-2</sup> | 0.0655  |
| Ammonium Sulfates | -5.33× 10 <sup>-3</sup>   | 4.48× 10 <sup>-2</sup> | 0.9053  | 5.91× 10 <sup>-2</sup>         | 4.62× 10 <sup>-2</sup>       | 0.2009          | 1.13× 10 <sup>-1</sup>  | 5.13× 10 <sup>-2</sup> | 0.0272  |
| Biomass Burning   | -2.70× 10 <sup>-2</sup>   | 4.78× 10 <sup>-2</sup> | 0.5733  | -2.31× 10 <sup>-2</sup>        | 4.92× 10 <sup>-2</sup>       | 0.6379          | 2.52× 10 <sup>-2</sup>  | 5.47× 10 <sup>-2</sup> | 0.6455  |
| Traffic           | 4.33× 10 <sup>-2</sup>    | 2.63× 10 <sup>-2</sup> | 0.0992  | -2.13× 10 <sup>-2</sup>        | 2.71× 10 <sup>-2</sup>       | 0.4308          | -5.29× 10 <sup>-2</sup> | 3.01× 10 <sup>-2</sup> | 0.0787  |
| Ammonium Nitrates | -1.73× 10 <sup>-2</sup>   | 3.31× 10 <sup>-2</sup> | 0.6001  | <b>-1.11× 10<sup>-01</sup></b> | <b>3.40× 10<sup>-2</sup></b> | <b>0.0010**</b> | 1.03× 10 <sup>-2</sup>  | 3.79× 10 <sup>-2</sup> | 0.7849  |
| Industrial        | 8.38× 10 <sup>-3</sup>    | 3.65× 10 <sup>-2</sup> | 0.8182  | 2.11× 10 <sup>-2</sup>         | 3.75× 10 <sup>-2</sup>       | 0.5734          | -3.79× 10 <sup>-2</sup> | 4.17× 10 <sup>-2</sup> | 0.3639  |

Linear regression models, adjusted for age, sex, race and ethnicity, overall household income, neighborhood safety, urbanicity, physical activity, daily screentime average hours, site and parental education. Estimates include unstandardized beta coefficients (*b*), standard errors, and p-values. Bolded values reflected models passing Bonferroni correction (p=0.008).

**Supplemental Figure 1. Directed Acyclic Graph (DAG) of potential confounders that may predict link between exposure to air pollution (based on residential location) and cognitive performance of children.** A) Dagitty model of potential confounders to identify minimally sufficient set (i.e. adjusted variables = white circles). B) Simplified DAG of confounders adjusted for in final models based on A.

A)

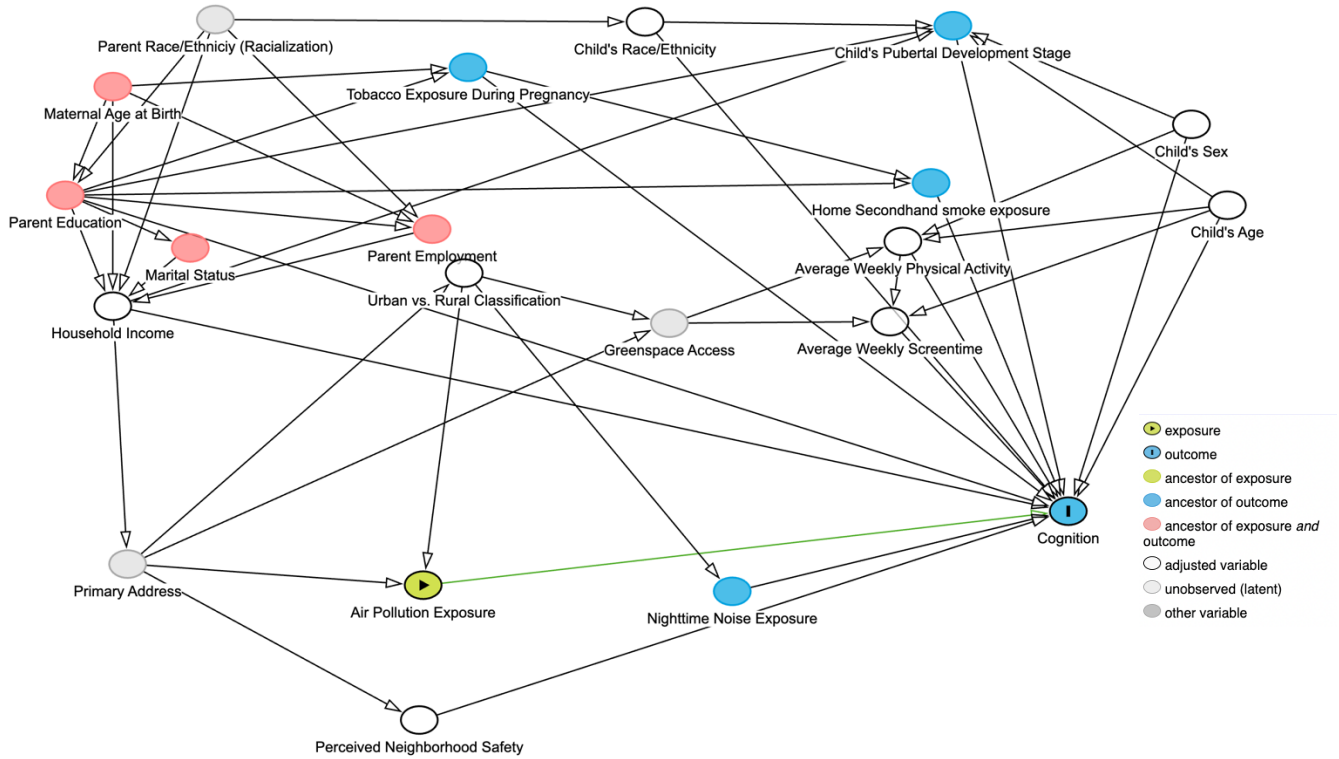

B)

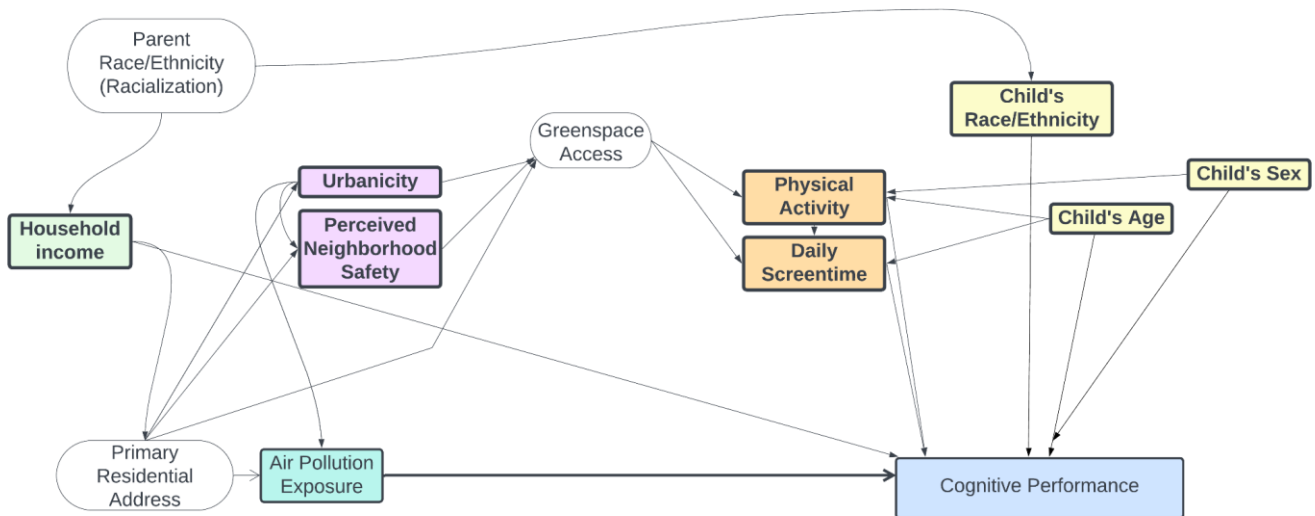

**Supplemental Figure 2. Correlation [Spearman] matrix of 15 PM<sub>2.5</sub> components estimated at the child's residence of all 9–10-year-old participants from the ABCD Study cohort (n=8,589), 2016-2018.**

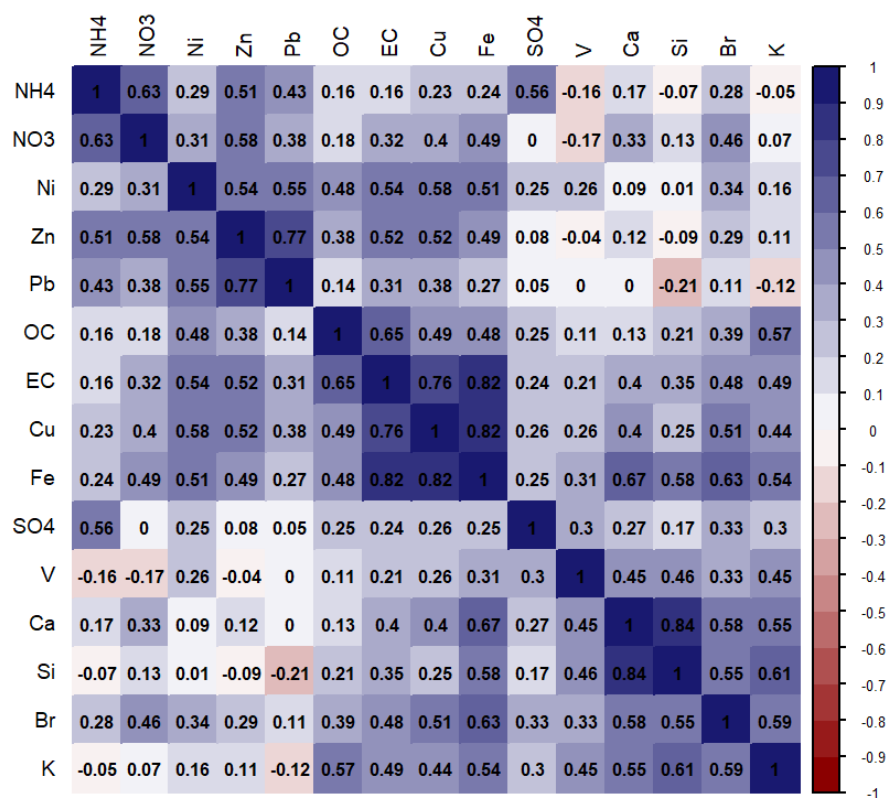

Abbreviations: SO<sub>4</sub><sup>2-</sup> for sulfate; NO<sub>3</sub><sup>-</sup> for nitrate; NH<sub>4</sub><sup>+</sup> for ammonium; OC for organic carbon; EC for elemental carbon; Zn for zinc; V or vanadium; K for potassium; Si for silicon; Pb for lead; Ni for nickel; Fe for iron; Cu for copper; Ca for calcium; Br for bromine. Numeric data for Supplemental Figure 2 can be found in Excel Table S8.

**Supplemental Figure 3: Distributions of residential PM<sub>2.5</sub> component exposure concentrations of all 9–10-year-old participants from the ABCD Study cohort (n=8,589), 2016-2018, plot by site.** Study sites are color coded by U.S. geographical region. Abbreviations: SO<sub>4</sub><sup>2-</sup> for sulfate; NO<sub>3</sub><sup>-</sup> for nitrate; NH<sub>4</sub><sup>+</sup> for ammonium; OC for organic carbon; EC for elemental carbon; Zn for zinc; V or vanadium; K for potassium; Si for silicon; Pb for lead; Ni for nickel; Fe for iron; Cu for copper; Ca for calcium; Br for bromine. Numeric data for Supplemental Figure 3 can be found in Excel Table S9.

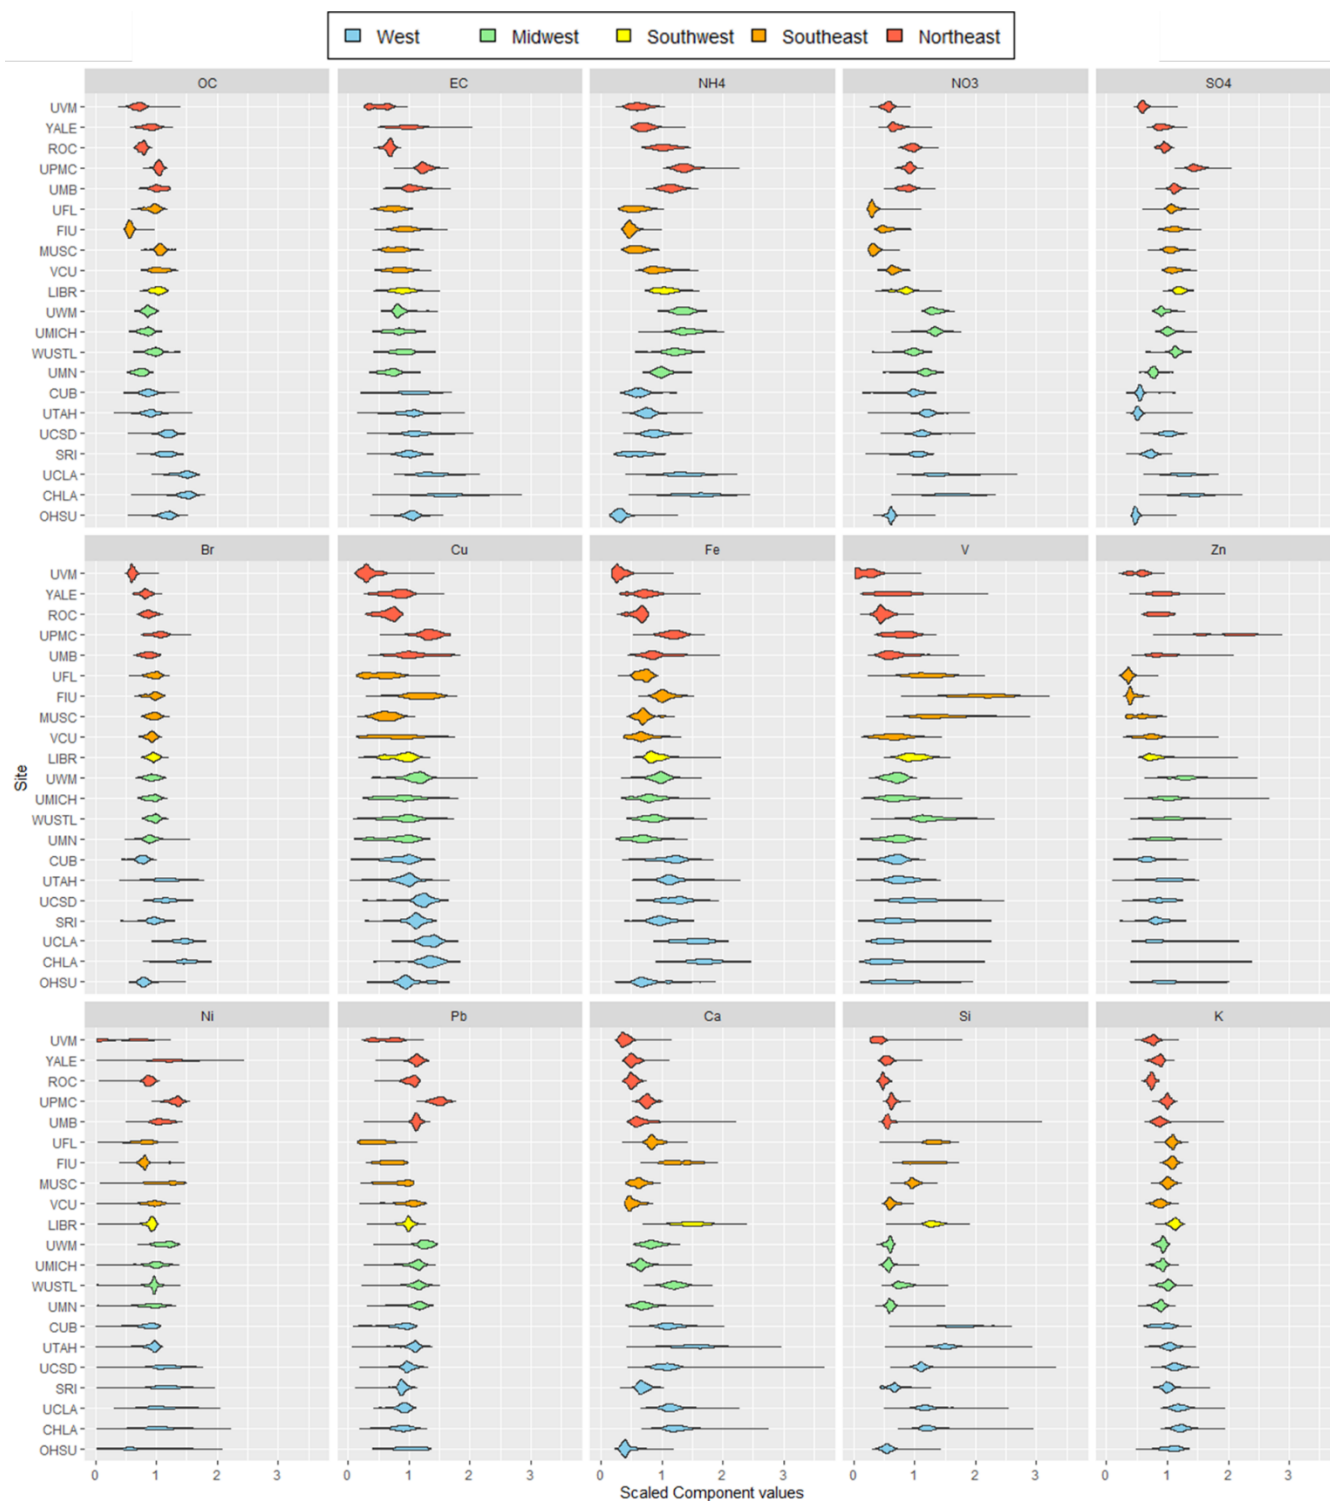

**Supplemental Figure 4: Weights of PM components, clustered by source factor groups, contributing to significant grouped mixture effects on neurocognitive outcomes in 9–10-year-old participants from the ABCD Study cohort (n=8,589), 2016-2018.** A) Weights for associations seen for general cognitive ability and crustal (negative association), industrial (negative association), and traffic (positive association) related components. B) Weights for association seen for learning & memory and ammonium nitrate-related components (negative association). C) Weights for associations seen for executive function and traffic (negative association) and biomass burning (positive association) related components. Abbreviations: NO<sub>3</sub><sup>-</sup> for nitrate; NH<sub>4</sub><sup>+</sup> for ammonium; OC for organic carbon; EC for elemental carbon; Zn for zinc; K for potassium; Si for silicon; Pb for lead; Ni for nickel; Fe for iron; Cu for copper; Ca for calcium; Br for bromine. Numeric data for Supplemental Figure 4 can be found in Excel Table S10.

A)

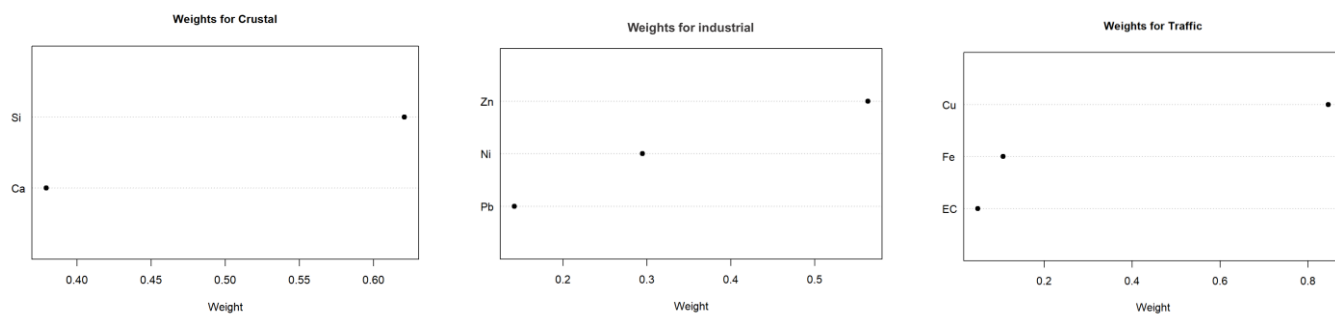

B)

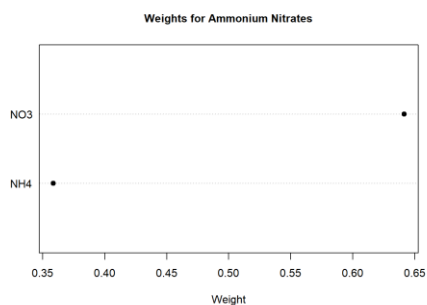

C)

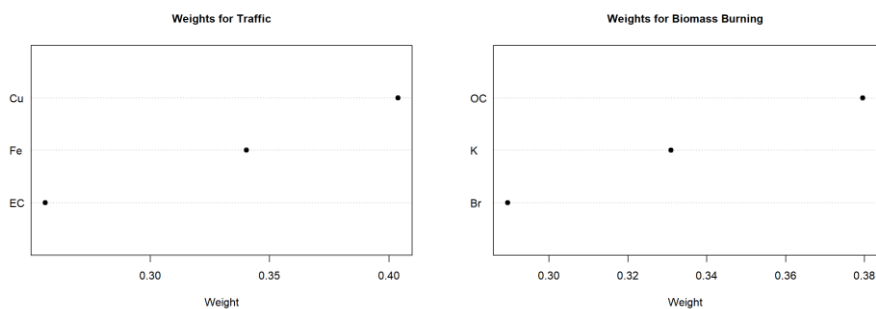

## Supplemental References

1. Greenland S, Brumback B. An overview of relations among causal modelling methods. *Int J Epidemiol*. 2002;31(5):1030-1037. doi:10.1093/ije/31.5.1030
2. Weng HY, Hsueh YH, Messam LLM, Hertz-Picciotto I. Methods of covariate selection: directed acyclic graphs and the change-in-estimate procedure. *Am J Epidemiol*. 2009;169(10):1182-1190. doi:10.1093/aje/kwp035
3. Echeverria SE, Diez-Roux AV, Link BG. Reliability of self-reported neighborhood characteristics. *J Urban Health*. 2004;81(4):682-701. doi:10.1093/jurban/jth151
4. Mujahid MS, Diez Roux AV, Morenoff JD, Raghunathan T. Assessing the measurement properties of neighborhood scales: from psychometrics to econometrics. *Am J Epidemiol*. 2007;165(8):858-867. doi:10.1093/aje/kwm040
5. Mennitt D, Sherrill K, Fristrup K. A geospatial model of ambient sound pressure levels in the contiguous United States. *The Journal of the Acoustical Society of America*. 2014;135(5):2746-2764. doi:10.1121/1.4870481
6. Petersen AC, Crockett L, Richards M, Boxer A. A self-report measure of pubertal status: Reliability, validity, and initial norms. *J Youth Adolesc*. 1988;17(2):117-133. doi:10.1007/BF01537962
7. Liu HL, Shen YS. The Impact of Green Space Changes on Air Pollution and Microclimates: A Case Study of the Taipei Metropolitan Area. *Sustainability*. 2014;6(12):8827-8855. doi:10.3390/su6128827
8. Textor J, van der Zander B, Gilthorpe MS, Liskiewicz M, Ellison GT. Robust causal inference using directed acyclic graphs: the R package "dagitty." *Int J Epidemiol*. 2016;45(6):1887-1894. doi:10.1093/ije/dyw341
9. Jin T, Amini H, Kosheleva A, et al. Associations between long-term exposures to airborne PM2.5 components and mortality in Massachusetts: mixture analysis exploration. *Environmental Health*. 2022;21(1):96. doi:10.1186/s12940-022-00907-2
